# Supplementary material for: Genome-Wide Identification and Functional Characterization Reveals the Pivotal Roles of BnaA8.ATG8F in Salt Stress Tolerance and Nitrogen Limitation Adaptation in Allotetraploid Rapeseed
Source: MDPI journal article supplement (doi:10.3390/ijms231911318), 2022-09-26
Supplement: s1 [file s1]

**Table S1. Copy number of *ATG8* genes in *Arabidopsis* and *Brassica* crops.**

| <b>Gene<br/>name</b> | <b><i>Arabidopsis thaliana</i><br/>(125 Mb)</b> | <b><i>Brassica rapa</i><br/>(465 Mb)</b> | <b><i>Brassica oleracea</i><br/>(485 Mb)</b> | <b><i>Brassica napus</i><br/>(1,130 Mb)</b> |
|----------------------|-------------------------------------------------|------------------------------------------|----------------------------------------------|---------------------------------------------|
| <i>ATG8A</i>         | 1                                               | 4                                        | 6                                            | 8                                           |
| <i>ATG8B</i>         | 1                                               | 0                                        | 1                                            | 0                                           |
| <i>ATG8C</i>         | 1                                               | 2                                        | 2                                            | 2                                           |
| <i>ATG8D</i>         | 1                                               | 0                                        | 0                                            | 2                                           |
| <i>ATG8E</i>         | 1                                               | 2                                        | 2                                            | 5                                           |
| <i>ATG8F</i>         | 1                                               | 2                                        | 3                                            | 6                                           |
| <i>ATG8G</i>         | 1                                               | 0                                        | 0                                            | 0                                           |
| <i>ATG8H</i>         | 1                                               | 2                                        | 2                                            | 4                                           |
| <i>ATG8I</i>         | 1                                               | 1                                        | 1                                            | 2                                           |
| Total                | 9                                               | 13                                       | 17                                           | 29                                          |

**Table S2. Molecular characterization of autophagy-related 8 genes in *Arabidopsis* and rapeseed**

| Gene ID          | Gene name          | Chromosome | MW (kDa) | PI   | II    | AI    | GRAVY | Subcellular localization |
|------------------|--------------------|------------|----------|------|-------|-------|-------|--------------------------|
| AT4G21980        | <i>AtATG8A</i>     |            | 13.69    | 8.78 | 39.51 | 85.49 | -0.24 | cyto                     |
| BnaA01T004000WE  | <i>BnaA1.ATG8A</i> | chrA1      | 13.78    | 6.59 | 32.1  | 84.67 | -0.23 | cyto                     |
| BnaA02T0252700WE | <i>BnaA2.ATG8A</i> | chrA2      | 14.12    | 8.78 | 37.87 | 86.67 | -0.25 | cyto                     |
| BnaA03T0470100WE | <i>BnaA3.ATG8A</i> | chrA3      | 15.46    | 8.61 | 36.32 | 84.01 | -0.08 | cyto                     |
| BnaA09T0224000WE | <i>BnaA9.ATG8A</i> | chrA9      | 13.64    | 7.78 | 40.87 | 83.67 | -0.31 | cyto                     |
| BnaC01T0120100WE | <i>BnaC1.ATG8A</i> | chrC1      | 15.48    | 6.59 | 35.15 | 86.13 | -0.12 | cyto                     |
| BnaC03T0624600WE | <i>BnaC2.ATG8A</i> | chrC2      | 15.48    | 9.06 | 38.95 | 83.85 | -0.25 | cyto                     |
| BnaC07T0384500WE | <i>BnaC3.ATG8A</i> | chrC3      | 15.42    | 8.95 | 34.19 | 84.74 | -0.14 | cyto                     |
| BnaC09T0256400WE | <i>BnaC9.ATG8A</i> | chrC9      | 13.65    | 7.78 | 36.18 | 86.08 | -0.32 | cyto                     |
| AT4G04620        | <i>AtATG8B</i>     |            | 13.88    | 8.61 | 37.83 | 79.1  | -0.29 | cyto                     |
| AT1G62040        | <i>AtATG8C</i>     |            | 13.73    | 8.83 | 49.75 | 85.97 | -0.39 | cyto                     |
| BnaA03T0589400WE | <i>BnaA3.ATG8C</i> | chrA3      | 7.70     | 9.45 | 32.78 | 90    | -0.38 | cyto                     |
| BnaC04T0234400WE | <i>BnaC4.ATG8C</i> | chrA4      | 13.62    | 7.92 | 46.54 | 89.24 | -0.29 | cyto                     |
| AT2G05630        | <i>AtATG8D</i>     |            | 13.91    | 7.93 | 45.72 | 88.58 | -0.29 | cyto                     |
| BnaA03T0399000WE | <i>BnaA3.ATG8D</i> | chrA3      | 13.72    | 7.9  | 50.46 | 88.49 | -0.33 | cyto                     |
| BnaC03T0408800WE | <i>BnaC3.ATG8D</i> | chrC3      | 13.71    | 7.9  | 50.34 | 88.49 | -0.33 | cyto                     |
| AT2G45170        | <i>AtATG8E</i>     |            | 13.95    | 7.82 | 31.25 | 83.03 | -0.42 | nucl                     |
| BnaA03T0231500WE | <i>BnaA3.ATG8E</i> | chrA3      | 13.93    | 8.69 | 29.43 | 83.85 | -0.52 | nucl                     |
| BnaA04T0272200WE | <i>BnaA4.ATG8E</i> | chrA4      | 11.74    | 5.46 | 40.75 | 94.66 | -0.42 | nucl                     |
| BnaA07T0195100WE | <i>BnaA7.ATG8E</i> | chrA7      | 13.87    | 6.33 | 26.79 | 87.05 | -0.41 | nucl                     |
| BnaC03T0195700WE | <i>BnaC3.ATG8E</i> | chrC3      | 13.91    | 8.69 | 30.28 | 84.67 | -0.49 | nucl                     |
| BnaC04T0588400WE | <i>BnaC4.ATG8E</i> | chrC4      | 12.41    | 5.5  | 41.81 | 84.81 | -0.54 | nucl                     |
| AT4G16520        | <i>AtATG8F</i>     |            | 13.76    | 8.73 | 35.08 | 83.8  | -0.41 | cyto                     |
| BnaA01T0105500WE | <i>BnaA1.ATG8F</i> | chrA1      | 11.79    | 5.4  | 27.59 | 86.38 | -0.24 | cyto                     |
| BnaA03T0443400WE | <i>BnaA3.ATG8F</i> | chrA3      | 19.96    | 7.73 | 46.58 | 83.64 | -0.28 | cyto                     |
| BnaA08T0093200WE | <i>BnaA8.ATG8F</i> | chrA8      | 13.52    | 7.84 | 29.97 | 85.93 | -0.18 | cyto                     |
| BnaC01T0182300WE | <i>BnaC1.ATG8F</i> | chrC1      | 13.50    | 6.6  | 27.63 | 84.37 | -0.43 | cyto                     |
| BnaC06T0196800WE | <i>BnaC6.ATG8F</i> | chrC6      | 23.61    | 6.84 | 40.52 | 96.03 | 0.05  | cyto                     |
| BnaC08T0097700WE | <i>BnaC8.ATG8F</i> | chrC8      | 33.42    | 5.2  | 45.02 | 91.29 | -0.34 | cyto                     |
| AT3G60640        | <i>AtATG8G</i>     |            | 13.94    | 5.87 | 42.24 | 79.67 | -0.45 | cyto                     |
| AT3G06420        | <i>AtATG8H</i>     |            | 13.88    | 6.83 | 41.1  | 72.86 | -0.45 | nucl                     |
| BnaA03T0314100WE | <i>BnaA3.ATG8H</i> | chrA3      | 20.49    | 9.23 | 42.55 | 81.62 | -0.23 | nucl                     |
| BnaA05T0417300WE | <i>BnaA5.ATG8H</i> | chrA5      | 13.71    | 7.85 | 40.44 | 68.74 | -0.46 | nucl                     |
| BnaC03T0296700WE | <i>BnaC3.ATG8H</i> | chrC3      | 13.74    | 6.09 | 39.37 | 76.13 | -0.36 | nucl                     |
| BnaC05T0512100WE | <i>BnaC5.ATG8H</i> | chrC5      | 13.70    | 6.9  | 39.4  | 68.74 | -0.44 | nucl                     |
| AT3G15580        | <i>AtATG8I</i>     |            | 13.25    | 7.7  | 44.02 | 82.26 | -0.23 | cyto                     |
| BnaA05T0347900WE | <i>BnaA5.ATG8I</i> | chrA5      | 13.23    | 6.59 | 47.23 | 86.52 | -0.21 | cyto                     |
| BnaC05T0420900WE | <i>BnaC5.ATG8I</i> | chrC5      | 14.98    | 8.5  | 37.98 | 96.09 | -0.15 | cyto                     |

Note: GRAVY, grand average of hydropathy; II, instability index; MW, molecular weight; pI, isoelectric point; PM, plasma membrane; TM, transmembrane; Vac, vacuole; Endo, endosome

Table S3. Molecular characterization of autophagy-related 8 genes in *Arabidopsis* and rapeseed.

| Gene ID          | Gene name          | Block | Protein Length (aa) | CDS Length (bp) | Exon/intron | Ka    | Ks    | Ka/Ks | Divergent time (Mya) |
|------------------|--------------------|-------|---------------------|-----------------|-------------|-------|-------|-------|----------------------|
| AT4G21980        | <i>AtATG8A</i>     | U     | 122                 | 369             |             |       |       |       |                      |
| BnaA01T0040000WE | <i>BnaA1.ATG8A</i> | U     | 122                 | 369             | 5           | 0.037 | 0.432 | 0.085 | 14.38                |
| BnaA02T0252700WE | <i>BnaA2.ATG8A</i> | U     | 126                 | 381             | 5           | 0.054 | 0.532 | 0.101 | 17.72                |
| BnaA03T0470100WE | <i>BnaA3.ATG8A</i> | U     | 137                 | 414             | 5           | 0.036 | 0.412 | 0.089 | 13.73                |
| BnaA09T0224000WE | <i>BnaA9.ATG8A</i> | U     | 120                 | 363             | 5           | 0.058 | 0.555 | 0.105 | 18.49                |
| BnaC01T0120100WE | <i>BnaC1.ATG8A</i> | U     | 137                 | 414             | 5           | 0.040 | 0.430 | 0.094 | 14.35                |
| BnaC03T0624600WE | <i>BnaC3.ATG8A</i> | U     | 135                 | 408             | 5           | 0.040 | 0.390 | 0.103 | 13.00                |
| BnaC07T0384500WE | <i>BnaC7.ATG8A</i> | U     | 139                 | 420             | 5           | 0.109 | 0.479 | 0.227 | 15.96                |
| BnaC09T0256400WE | <i>BnaC9.ATG8A</i> | U     | 120                 | 363             | 5           | 0.066 | 0.555 | 0.119 | 18.49                |
| AT4G04620        | <i>AtATG8B</i>     | O     | 122                 | 369             |             |       |       |       |                      |
| AT1G62040        | <i>AtATG8C</i>     | D     | 119                 | 360             |             |       |       |       |                      |
| BnaA03T0589400WE | <i>BnaA3.ATG8C</i> | D     | 66                  | 201             | 3           | 0.077 | 0.340 | 0.226 | 11.32                |
| BnaC04T0234400WE | <i>BnaC4.ATG8C</i> | D     | 119                 | 360             | 5           | 0.049 | 0.231 | 0.211 | 7.69                 |
| AT2G05630        | <i>AtATG8D</i>     | G     | 120                 | 363             |             |       |       |       |                      |
| BnaA03T0399000WE | <i>BnaA3.ATG8D</i> | G     | 119                 | 360             | 5           | 0.015 | 0.531 | 0.027 | 17.70                |
| BnaC03T0408800WE | <i>BnaC3.ATG8D</i> | G     | 119                 | 360             | 5           | 0.018 | 0.389 | 0.047 | 12.98                |
| AT2G45170        | <i>AtATG8E</i>     | J     | 122                 | 369             |             |       |       |       |                      |
| BnaA03T0231500WE | <i>BnaA3.ATG8E</i> | J     | 122                 | 369             | 4           | 0.030 | 0.433 | 0.070 | 14.45                |
| BnaA04T0272200WE | <i>BnaA4.ATG8E</i> | J     | 103                 | 312             | 4           | 0.118 | 0.486 | 0.242 | 16.21                |
| BnaA07T0195100WE | <i>BnaA7.ATG8E</i> | J     | 122                 | 369             | 4           | 0.037 | 0.397 | 0.093 | 13.24                |
| BnaC03T0195700WE | <i>BnaC3.ATG8E</i> | J     | 122                 | 369             | 4           | 0.034 | 0.482 | 0.071 | 16.06                |
| BnaC04T0588400WE | <i>BnaC4.ATG8E</i> | J     | 108                 | 327             | 5           | 0.096 | 0.480 | 0.200 | 16.01                |

|                  |                    |   |     |     |   |       |       |       |        |
|------------------|--------------------|---|-----|-----|---|-------|-------|-------|--------|
| AT4G16520        | <i>AtATG8F</i>     | U | 121 | 366 |   |       |       |       |        |
| BnaA01T0105500WE | <i>BnaA1.ATG8F</i> | U | 105 | 318 | 4 | 0.067 | 0.373 | 0.180 | 12.43  |
| BnaA03T0443400WE | <i>BnaA3.ATG8F</i> | U | 176 | 531 | 7 | 0.152 | 0.438 | 0.348 | 14.58  |
| BnaA08T0093200WE | <i>BnaA8.ATG8F</i> | U | 118 | 357 | 5 | 0.030 | 0.234 | 0.127 | 7.81   |
| BnaC01T0182300WE | <i>BnaC1.ATG8F</i> | U | 119 | 360 | 5 | 0.022 | 0.394 | 0.056 | 13.15  |
| BnaC06T0196800WE | <i>BnaC6.ATG8F</i> | U | 209 | 630 | 6 | 0.040 | 0.370 | 0.109 | 12.33  |
| BnaC08T0097700WE | <i>BnaC8.ATG8F</i> | U | 286 | 861 | 8 | 0.030 | 0.252 | 0.118 | 8.39   |
| AT3G60640        | <i>AtATG8G</i>     | N | 121 | 366 |   |       |       |       |        |
| AT3G06420        | <i>AtATG8H</i>     | F | 119 | 360 |   |       |       |       |        |
| BnaA03T0314100WE | <i>BnaA3.ATG8H</i> | F | 179 | 540 | 5 | 0.052 | 0.531 | 0.097 | 17.71  |
| BnaA05T0417300WE | <i>BnaA5.ATG8H</i> | F | 119 | 360 | 5 | 0.069 | 0.373 | 0.185 | 12.45  |
| BnaC03T0296700WE | <i>BnaC3.ATG8H</i> | F | 119 | 360 | 5 | 0.050 | 0.467 | 0.106 | 15.56  |
| BnaC05T0512100WE | <i>BnaC5.ATG8H</i> | F | 119 | 360 | 5 | 0.065 | 0.373 | 0.174 | 12.45  |
| AT3G15580        | <i>AtATG8I</i>     | F | 115 | 348 |   |       |       |       |        |
| BnaA05T0347900WE | <i>BnaA5.ATG8I</i> | F | 115 | 348 | 5 | 0.027 | 0.349 | 0.077 | 11.63  |
| BnaC05T0420900WE | <i>BnaC5.ATG8I</i> | F | 133 | 402 | 3 | 0.051 | 0.449 | 0.113 | 14.957 |

Note: CDS, coding sequence; Ka, non-synonymous nucleotide substitution rate; Ks, synonymous nucleotide substitution rate.

**Table S4. Gene used to validate the transcriptome information and sequence of primers**

| ggen                 | F sense primer                 | R anti-sense primer           |
|----------------------|--------------------------------|-------------------------------|
| <i>BnaA8.ATG8F</i>   | 5-TGCTCGGATCAGAGAGAAGTA-3      | 5-TGCCCCACTGTCAAATCAGCC-3     |
| <i>BnaC8.NRT2.1a</i> | 5-AAAGGTACTGAGGAGCACTATTATGG-3 | 5-GTATTCTGAGGCGGCGTAGC-3      |
| <i>BnaC2.NAR2.1</i>  | 5-TCAAGAAGCTCCTTTTCGCG-3       | 5-TAAATTCAGGCTCCTTTGTAGCC-3   |
| <i>BnaC2.NRT1.7</i>  | 5-GCTGGATCATCGGCTTTAGC -3      | 5-GAGCTTCATCTTTCGCTTCTTG -3   |
| <i>BnaA3.NRT1.8</i>  | 5-GGGTATGGTGGTTATCAGCCC -3     | 5-CGAAAGGAGCGATCCGAGG -3      |
| <i>BnaEF1-α</i>      | 5-GCCTGGTATGGTTGTGACCT -3      | 5- GAAGTTAGCAGCACCCCTTGG-3    |
| <i>BnaTublin</i>     | 5-CAGCAATACAGTGCCTTGAGTG-3     | 5-CCTGTGTACCAATGAAGGAAAGCC -3 |
